# Supplementary material for: Alterations in acylcarnitines, amines, and lipids inform about the mechanism of action of citalopram/escitalopram in major depression
Source: PubMed Central journal article supplement (PMC7925685; doi:10.1038/s41398-020-01097-6), 2021-03-02

### Supplementary Fig 3. Principal Components Analysis of Acylcarnitines

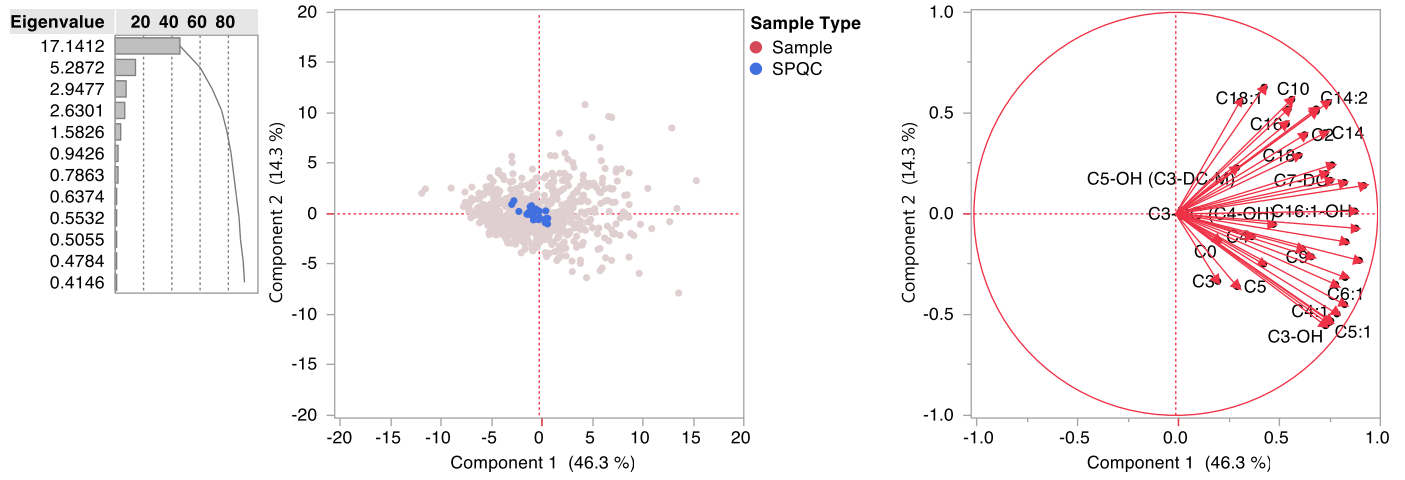

Supplement: 41398_2020_1097_MOESM8_ESM.pdf [file 41398_2020_1097_MOESM8_ESM.pdf]
