# Supplementary material for: Alterations in acylcarnitines, amines, and lipids inform about the mechanism of action of citalopram/escitalopram in major depression
Source: PubMed Central journal article supplement (PMC7925685; doi:10.1038/s41398-020-01097-6), 2021-03-02
Supplement: 41398_2020_1097_MOESM11_ESM.pdf [file 41398_2020_1097_MOESM11_ESM.pdf]

## Supplementary Fig 6. Changes in Metabolite Levels after 8 weeks of SSRI Treatment Stratified by Sex, Age and Drug

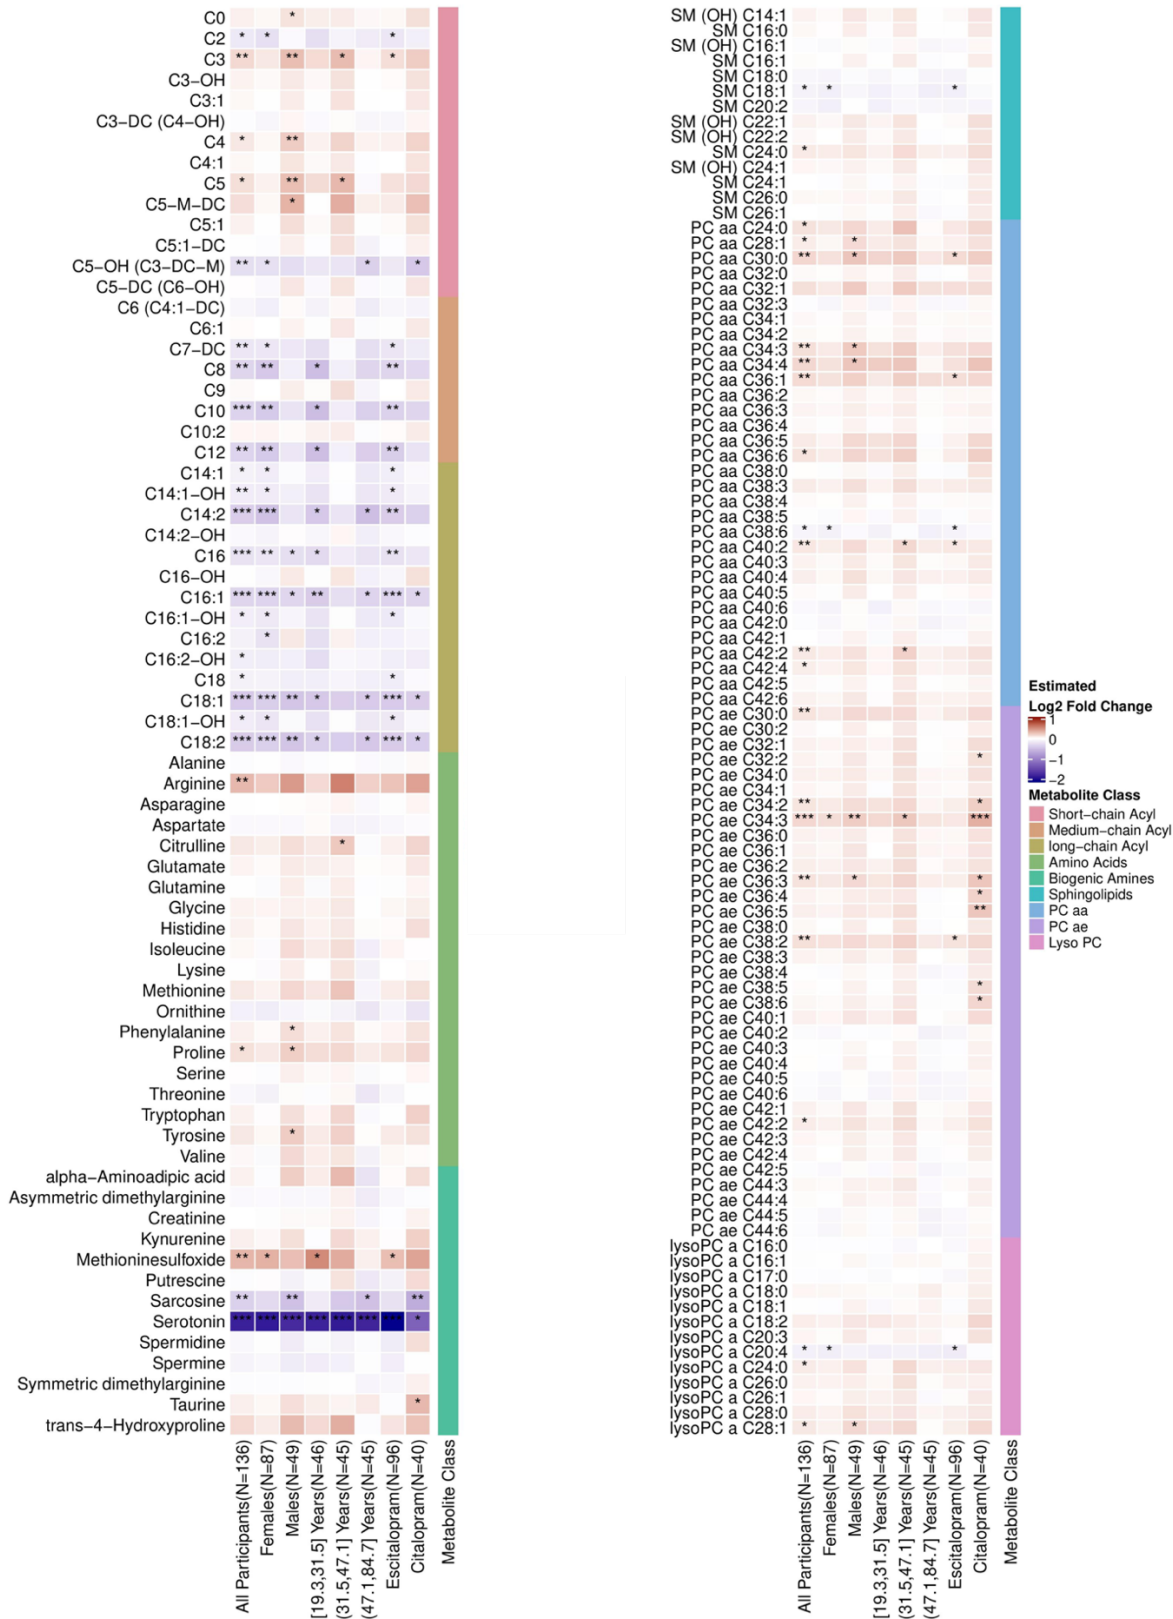

Significance level was set to  $\alpha=0.05$  after Benjamin-Hochberge FDR correction.  $p$ -values obtained from linear mixed-effect models adjusted for covariate stratified by 1) No stratification: age, sex, baseline HRSD<sub>17</sub> and antidepressant. 2) Sex: age, baseline HRSD<sub>17</sub> and antidepressant. 3) Age: Sex, baseline HRSD<sub>17</sub> and antidepressant 4) Drug: age, sex, and baseline HRSD<sub>17</sub>; \*\*\*:  $q$ -value < 0.001; \*\*:  $q$ -value < 0.01; \*:  $q$  < 0.05
