# Supplementary material for: Alterations in acylcarnitines, amines, and lipids inform about the mechanism of action of citalopram/escitalopram in major depression
Source: PubMed Central journal article supplement (PMC7925685; doi:10.1038/s41398-020-01097-6), 2021-03-02
Supplement: 41398_2020_1097_MOESM12_ESM.pdf [file 41398_2020_1097_MOESM12_ESM.pdf]

## Supplementary Fig 7. Effect of 8 Weeks SSRI Treatment on Levels of Ether Phosphatidylcholines.

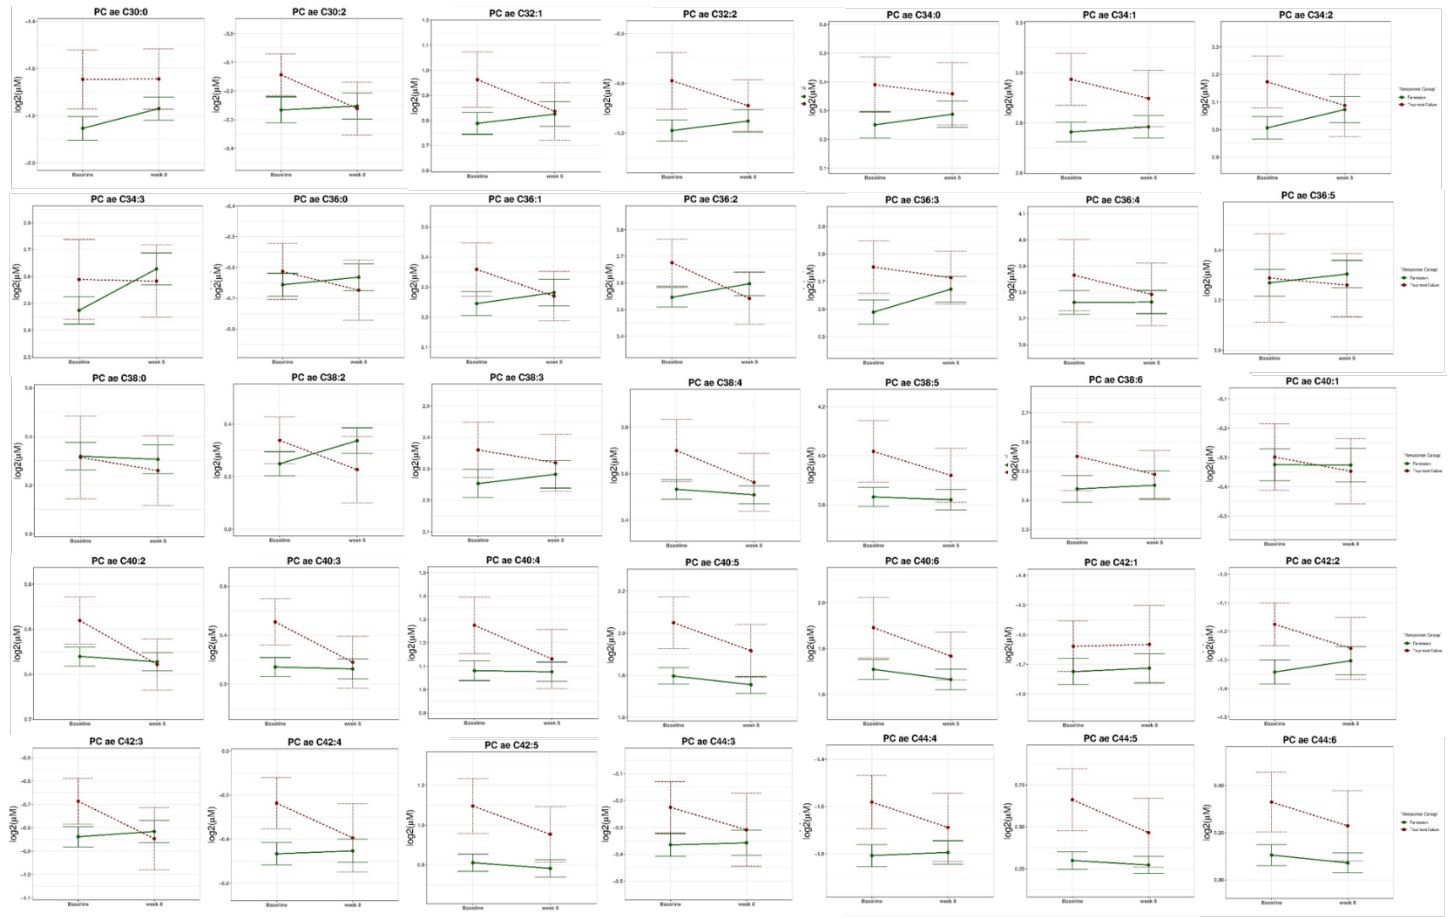

Mean(SE) concentration of etherphosphatidylcholines at baseline and week 8 for the “Remission” and “Treatment failure” groups were calculated. Solid green lines represent “Remission” group and dotted red lines represents “Treatment failure” group.

*Abbreviations:* SSRI: Selective Serotonin Reuptake Inhibitor, PC: Phosphatidylcholine. Metabolite abbreviations are spelled out in **Supplementary Table 1**.
